# Supplementary material
Source: publisher site journal article supplement (https://thieme-connect.com/media/10.1055-s-00035024/201606/supmat/10-1160-th15-11-0847-supp.pdf)
Supplement: Supplementary file 1 [file 10-1160-th15-11-0847-supp.pdf]

## **Supplementary Material to Sambola et al. “Increased von Willebrand factor, P-selectin and fibrin content in occlusive thrombus resistant to lytic therapy” (Thromb Haemost 2016; 115.6)**

### **Turbidimetric assays and fibrinolysis *in vitro***

*Ex vivo* plasma fibrin clot turbidimetry and effectiveness of fibrinolysis were determined using r-TPA following a previously described method in 44 patients undergoing p-PCI to verify sensitivity to fibrinolysis. Fibrin clot structure was evaluated by turbidimetric assays in citrated plasma in duplicate as previously described <sup>(8)</sup>. In a plasma sample, clot formation was induced using thrombin plus CLCA2 according to a method described previously. The interassay coefficients of variation (CV) ranged from 9% to 21%. After thrombus formation was achieved, r-TPA was added at concentrations of 1, 2.2, 3.3 and 100 mg/ml (the 2.2 mg/ml concentration is the most similar to that received by patients).

### **Formation clot fibrinolysis in plasma and r-TPA**

The following key parameters were recorded to assess resistance to fibrinolysis: a) clot maximum absorbance (arbitrary units), evaluating fibrin fiber thickness and network density; b) fibrinolysis time (min) corresponding to the time from maximum clot formation to 50% fibrinolysis, turbidity at 405 nm (t 50%) induced by 1 mg/ml of r-TPA, as described previously; and c) fibrinolysis area, which reflects the balance between clot formation and fibrinolysis <sup>(8)</sup>. The interassay CVs were from 8% to 22%. (Figures S1. A, B, C)

**Figure S1.** Illustration of turbidimetric clotting and fibrinolysis variables in: A) a patient sensitive to fibrinolysis; B) a healthy subject; C) a patient resistant to fibrinolysis. A, Turbidimetric clotting assay: lag time (LagC); maximum absorbance (ODC); clot rate (CRC). B, Turbidimetric fibrinolysis assay: lag time (LagL); maximum absorbance (ODL); clot rate

(CRL); fibrinolysis times Lys50t0, Lys50MA, LysT; fibrinolysis rate (LR); area clot. Red and blue lines represent clot formation, while green and pink represent clot fibrinolysis.

maxim absorbance to lysis,  $MaxAbs_c$ ; Clot maximum absorbance (arbitrary units (au)). evaluating fibrin fiber thickness and network density;  $MaxAbs_L$  the highest absorbance value adjusted for  $Lag_L$ ;  $CR_c$ ; crude rate of clot formation ;  $CR_L$  crude rate of clot formation; **Clot time**; **Lysis 50<sub>t0</sub>**: the time from initiation of clot formation to the time at which a 50% fall in absorbance from  $MaxAbs_L$  occurred; **Lysis Time, t<sub>50%</sub>**: corresponding to the time from maximum clot formation to 50% lysis, turbidity at 405 nm (t 50%) induced by 1 g / ml of r-TPA, as described previously, **Lys<sub>T</sub>**: the time from and crude lysis rate; **AUC**: reflects the balance between clot formation and clot lysis.

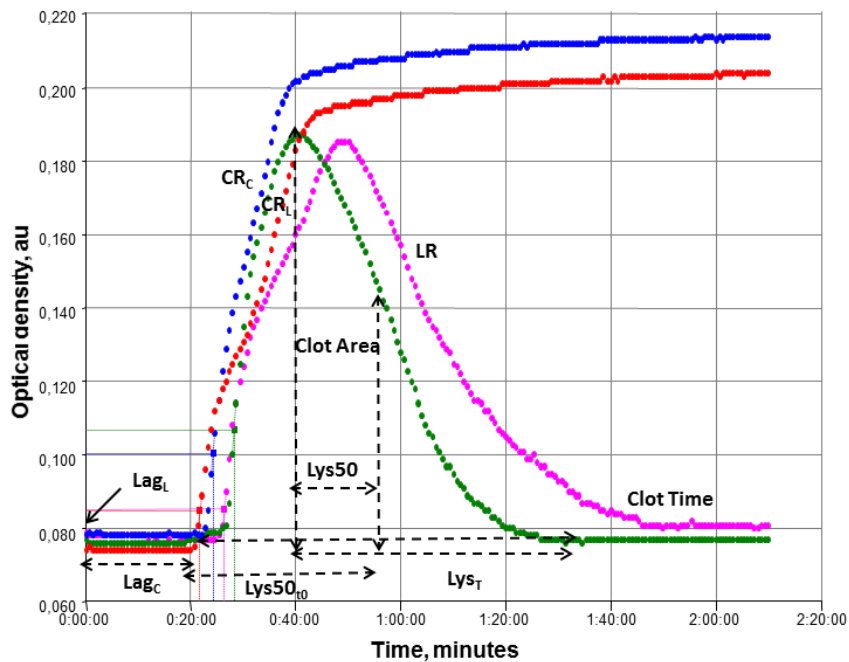

Supplementary Figure 1A

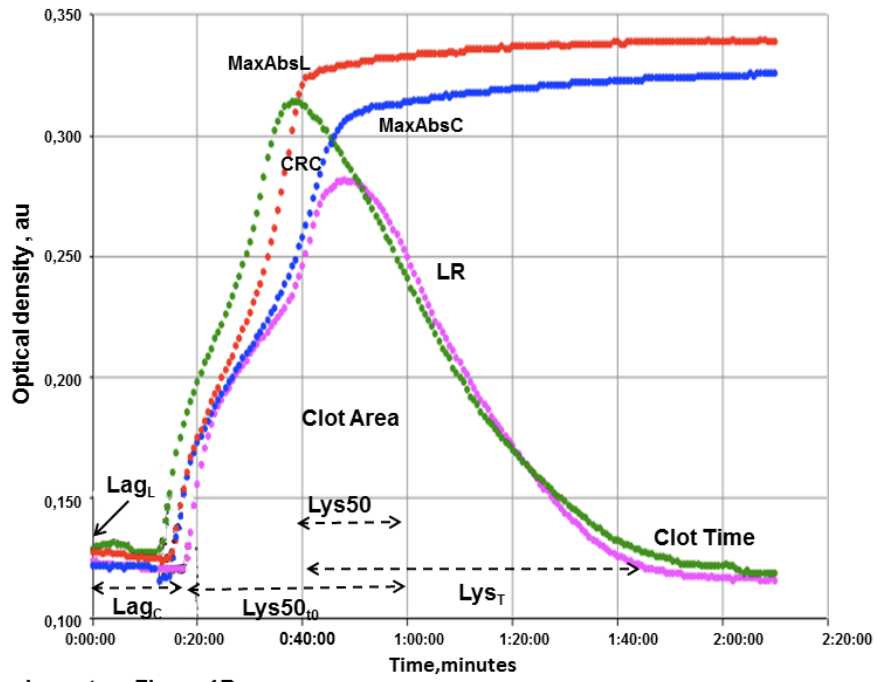

Supplementary Figure 1B

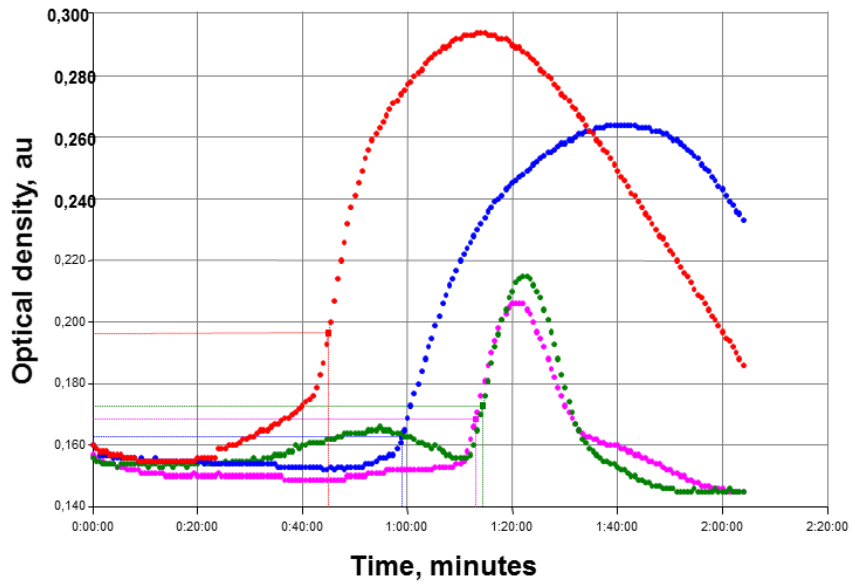

Supplementary Figure 1C

**Suppl. Table 1.** Comparison of turbidimetric and fibrinolysis measures of clot between patients undergoing primary PCI and healthy subjects.

|                                                             | <b>Sensitive to<br/>fibrinolysis</b> | <b>Healthy<br/>donors</b> | <b>p</b> |
|-------------------------------------------------------------|--------------------------------------|---------------------------|----------|
|                                                             | <b>N=20</b>                          | <b>N=20</b>               |          |
| <b>Lag time without t-PA, (Lag<sub>c</sub>), min</b>        | 17.86 ± 7.94                         | 19.48 ± 6.12              | 0.65     |
| <b>OD max without t-PA (MaxAbs<sub>c</sub>), min</b>        | 0.15 ± 0.07                          | 0.18 ± 0.02               | 0.41     |
| <b>Crude rate clot formation CR<sub>c</sub>, min</b>        | 9.25 ± 3.87                          | 11.16 ± 6.59              | 0.38     |
| <b>Clot time, min</b>                                       | 84.97 ± 23.96                        | 91.16 ± 19.35             | 0.57     |
| <b>Lag time with t-PA, (Lag<sub>L</sub>), min</b>           | 19.26 ± 10.15                        | 18.35 ± 5.30              | 0.84     |
| <b>OD max with t-PA (MaxAbs<sub>L</sub>), min</b>           | 0.13 ± 0.75                          | 0.17 ± 0.02               | 0.29     |
| <b>Crude rate clot lysis, with t-PA CR<sub>L</sub>, min</b> | 9.66 ± 6.42                          | 14.42 ± 6.84              | 0.13     |
| <b>Lysis Time 50%, min</b>                                  | 29.88 ± 2.58                         | 32.80 ± 8.49              | 0.33     |
| <b>Lysis 50<sub>t0</sub>, min</b>                           | 51.88 ± 13.30                        | 47.07 ± 8.50              | 0.45     |
| <b>Lysis total, min (Lys<sub>T</sub>)</b>                   | 66.05 ± 23.07                        | 71.80 ± 14.52             | 0.58     |
| <b>Clot area (AUC)</b>                                      | 0.01 ± 0.007                         | 0.01 ± 0.07               | 0.32     |

PCI: percutaneous coronary intervention; Lag<sub>c</sub>: Time at which sufficient protofibrils have formed to enable lateral aggregation in the absence of tPA (i.e. initiation of clot formation); Lag<sub>L</sub>: Time elapsed from the addition of tPA to maximal lysis; **MaxAbsC**: Highest absorbance value of the clot (arbitrary units), an index of fibrin fiber thickness and network density; **MaxAbsL**: highest absorbance value after the addition of tPA; **CR<sub>c</sub>**: crude rate of clot formation; **CR<sub>L</sub>**: crude rate of clot lysis after the addition of tPA; **Clot time**: total time elapsed from the initiation of clot formation to final clot lysis ; **Lysis t50**: time elapsed from maximal lysis absorbance (MaxAbsL) to the moment at which 50% fall in absorbance occurred; **Lysis Time, t<sub>50%</sub>**: Time elapsed from maximum clot formation to 50% lysis; **Lys<sub>T</sub>**: Total time elapsed from the initiation of clot formation to final clot lysis Time from and crude lysis rate; **AUC**: area under the curve, reflects the balance between clot formation and clot lysis. Turbidity is quantified at 405 nm and lysis is induced by 1 g/ml of r-TPA.
